# Supplementary material for: miR-23a binds to p53 and enhances its association with miR-128 promoter
Source: PubMed Central journal article supplement (PMC4639766; doi:10.1038/srep16422), 2015-11-10

## Supplementary material

### **miR-23a Binds to p53 and Enhances its Association with miR-128 Promoter**

**Jincheng Li<sup>1\*</sup>, Lynn Htet Htet Aung<sup>2\*</sup>, Bo Long<sup>3\*</sup>, Danian Qin<sup>1</sup>, Shejuan An<sup>2</sup> and Peifeng Li<sup>2</sup>**

<sup>1</sup> Department of Physiology, Shantou University School of Medicine, Shantou 515031, China

<sup>2</sup> Department of Microbiology and Immunology, College of Medicine, University of Illinois at Chicago, Chicago, IL 60612, USA

<sup>3</sup> Central Research Laboratory, Peking Union Medical College Hospital, Peking Union Medical College & Chinese Academy of Medical Sciences, Beijing, 100730, China

\*These authors contributed equally to this work.

#### **Supplementary figure legend**

**Supplementary figure S1.** A control ChIP-qPCR assay was performed using primer encompassing miR-128 promoter region without p53 binding domain. Cardiomyocytes were treated with miR-23a antogomir and the cells were collected for ChIP-qPCR assays. miR-128 promoter without p53 binding site did not associate with p53 regardless of presence or absence of miR-23a antagomir.

**Supplementary figure S2.** The schematic diagram showing miR-23a promotes p53 transactivation on miR-128, which induces apoptosis by inhibiting prohibitin expression in oxidative stress-induced cardiomyocyte.

## Supplementary figure S1

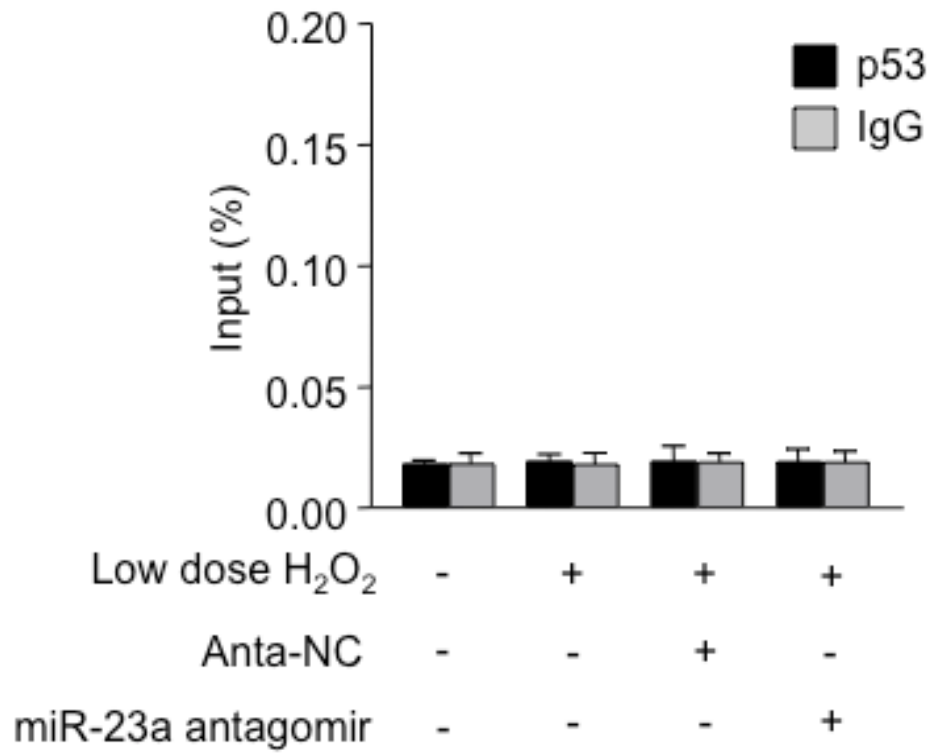

Supplementary figure S2

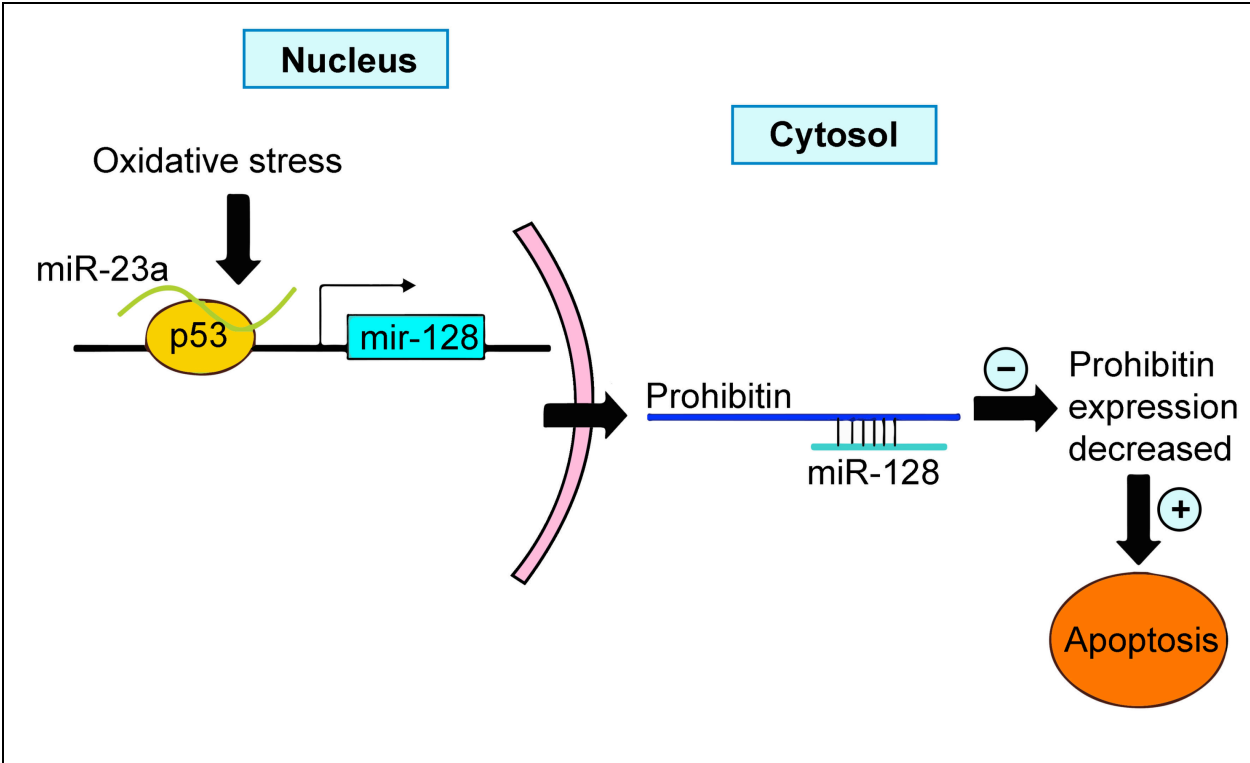

Supplement: srep16422-s1.pdf [file srep16422-s1.pdf]
